# Supplementary material
Source: PubMed Central journal article supplement (PMC5817608)
Supplement: jama-318-360-s001.pdf [file jama-318-360-s001.pdf]

## Supplementary Online Content

Mez J, Daneshvar DH, Kiernan PT, et al. Clinicopathological evaluation of chronic traumatic encephalopathy in players of American football. *JAMA*. doi:10.1001/jama.2017.8334

**eFigure.** Enrollment Flow Chart

**eTable.** Clinical Features Stratified by CTE Severity Among Players With Pure CTE

This supplementary material has been provided by the authors to give readers additional information about their work.

**eFigure 1. Enrollment Flow Chart**

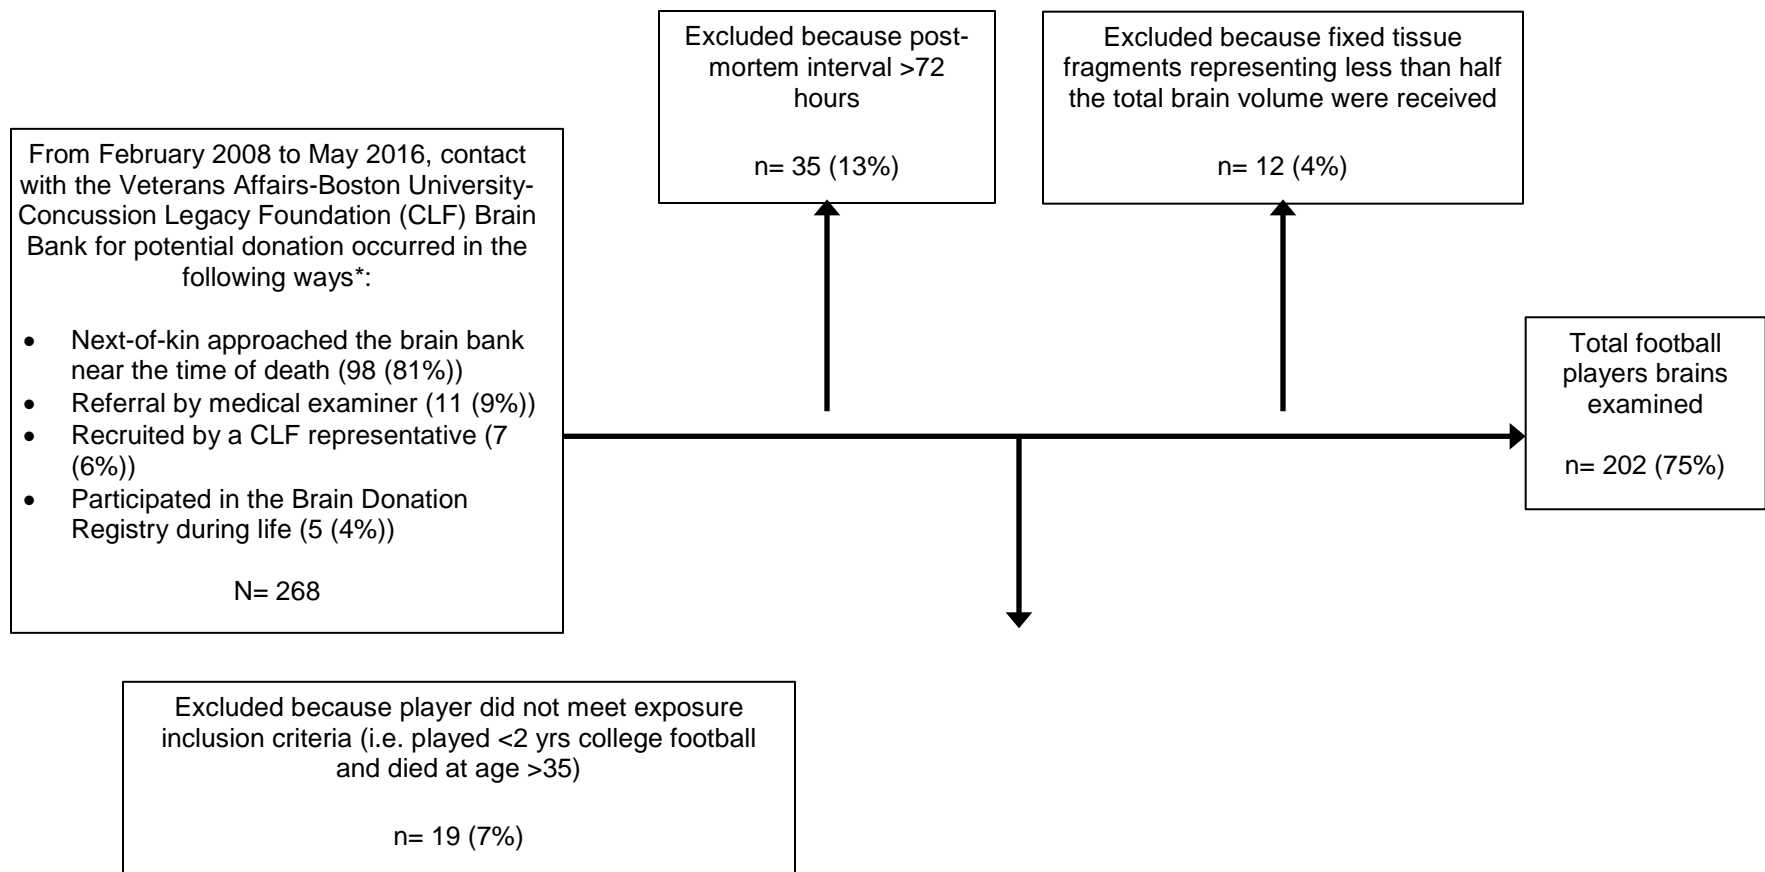

\*Percentages calculated based on tracking beginning in 2014 (n= 121)

**eTable 1. Clinical Features Stratified by CTE Severity Among Players With Pure CTE\*#**

| <b>Clinical features</b>                              | <b>Mild<br/>No. (%)</b> | <b>Severe<br/>No. (%)</b> | <b>Total<br/>No. (%)</b> |
|-------------------------------------------------------|-------------------------|---------------------------|--------------------------|
| Cognitive symptoms                                    | 17 (85)                 | 36 (90)                   | 53 (88)                  |
| Memory                                                | 14 (70)                 | 33 (85)                   | 47 (80)                  |
| Executive function                                    | 13 (68)                 | 28 (72)                   | 41 (71)                  |
| Attention                                             | 13 (68)                 | 28 (72)                   | 41 (71)                  |
| Language                                              | 6 (32)                  | 21 (54)                   | 27 (47)                  |
| Visuospatial                                          | 4 (21)                  | 16 (41)                   | 20 (35)                  |
| Fluctuating cognition                                 | 0                       | 7 (18)                    | 7 (12)                   |
| Dementia                                              | 3 (15)                  | 28 (70)                   | 31 (52)                  |
| Behavioral or mood symptoms                           | 20 (100)                | 37 (93)                   | 57 (95)                  |
| Impulsivity                                           | 18 (95)                 | 31 (80)                   | 49 (85)                  |
| Depressive symptoms                                   | 16 (80)                 | 23 (59)                   | 39 (66)                  |
| Explosivity                                           | 16 (80)                 | 18 (45)                   | 34 (57)                  |
| Apathy                                                | 11 (58)                 | 25 (64)                   | 36 (62)                  |
| Anxiety                                               | 13 (65)                 | 22 (56)                   | 35 (59)                  |
| Hopelessness                                          | 14 (74)                 | 16 (44)                   | 30 (55)                  |
| Verbally violent                                      | 14 (70)                 | 15 (40)                   | 29 (50)                  |
| Socially inappropriate                                | 10 (50)                 | 13 (34)                   | 23 (39)                  |
| Physically violent                                    | 13 (65)                 | 13 (33)                   | 26 (44)                  |
| Paranoia                                              | 10 (50)                 | 12 (31)                   | 22 (37)                  |
| Suicidality (including ideation, attempts or suicide) | 14 (70)                 | 12 (31)                   | 26 (44)                  |
| Visual hallucinations                                 | 2 (11)                  | 8 (21)                    | 10 (18)                  |
| Mania                                                 | 5 (25)                  | 2 (5)                     | 7 (12)                   |
| PTSD (exposure and symptoms consistent with)          | 3 (15)                  | 6 (15)                    | 9 (15)                   |
| Substance use disorder                                | 15 (75)                 | 25 (63)                   | 40 (66)                  |
| Alcohol                                               | 11 (58)                 | 21 (54)                   | 32 (55)                  |
| Anabolic steroid                                      | 0                       | 3 (7)                     | 3 (5)                    |
| Other                                                 | 13 (68)                 | 14 (36)                   | 27 (47)                  |
| Motor symptoms                                        | 9 (45)                  | 24 (60)                   | 33 (54)                  |
| Gait instability                                      | 4 (20)                  | 20 (50)                   | 24 (40)                  |
| Slowness                                              | 2 (10)                  | 16 (40)                   | 18 (30)                  |
| Coordination difficulties                             | 3 (15)                  | 12 (30)                   | 15 (25)                  |
| Falls                                                 | 2 (10)                  | 14 (35)                   | 16 (27)                  |
| Tremor                                                | 3 (15)                  | 15 (38)                   | 18 (30)                  |
| Dysphagia                                             | 0                       | 4 (11)                    | 4 (7)                    |
| Dysarthria                                            | 2 (10)                  | 3 (8)                     | 5 (9)                    |
| Headache                                              | 7 (35)                  | 8 (21)                    | 15 (25)                  |
| Diagnoses in life                                     |                         |                           |                          |
| MND                                                   | 0                       | 0                         | 0                        |
| PD                                                    | 0                       | 0                         | 0                        |

|                           |        |         |         |
|---------------------------|--------|---------|---------|
| AD                        | 0      | 6 (15)  | 6 (10)  |
| OSA diagnosis or symptoms | 4 (21) | 19 (53) | 23 (42) |
| RBD diagnosis or symptoms | 4 (21) | 12 (32) | 16 (29) |

\*Pure CTE refers to the absence of concomitant neuropathological diagnoses

#Mild CTE (CTE pathological stages I and II) is characterized by sparse- frequent perivascular CTE lesions at the sulcal depths of the cerebral cortex. Severe CTE (CTE pathological stages III and IV) consists of multiple CTE lesions in the cerebral cortex and moderate- severe neurofibrillary degeneration of medial temporal lobe, diencephalon and brainstem.

Abbreviations: AD: Alzheimer’s disease; MND: motor neuron disease; OSA: obstructive sleep apnea; PD: Parkinson’s disease; PTSD: post-traumatic stress disorder; RBD: rapid eye movement sleep behavior disorder; SD: standard deviation

There were 60 participants with identical clinical evaluations. This included 20 participants with mild CTE and 40 participants with severe CTE. Sample sizes differed across clinical features because features marked as “unknown” by the clinician were excluded. For participants with mild CTE, sample sizes ranged from 18 to 20 and for participants with severe CTE, sample sizes ranged from 36 to 40.
